# Supplementary material for: Development of Functional Composite Cu(II)-Polyoxometalate/PLA with Antimicrobial Properties
Source: MDPI journal article supplement (doi:10.3390/molecules27082510), 2022-04-13

## Electronic Supporting Information

### Development of functional composite Cu(II)-polyoxometalate/ PLA with antimicrobial properties

Ella Duvanova<sup>1,2</sup>, Illia Krasnou<sup>3</sup>, Andres Krumme<sup>3</sup>, Valdek Mikli<sup>3</sup>, Serhii Radio<sup>2</sup>, Georgiy Rozantsev<sup>2</sup>,  
Yevgen Karpichev<sup>1</sup>

<sup>1</sup> Department of Chemistry and Biotechnology, Tallinn University of Technology (TalTech), Estonia

<sup>2</sup> Research Laboratory "Chemistry of Polyoxometalates and Complex Oxide Systems" Vasyl' Stus Donetsk National University,  
Vinnytsia, Ukraine

<sup>3</sup> Department of Materials and Environmental Technology, Tallinn University of Technology (TalTech), Estonia

#### TABLE OF CONTENT

- Figure S1.** SEM images of  $\text{Na}_2\text{Cu}_3(\text{CuOH})_2[\text{W}_{12}\text{O}_{40}(\text{OH})_2] \cdot 32\text{H}_2\text{O}$  powder in the characteristic X-ray emission.
- Figure S2.** Surface micromorphology of triturated  $\text{Na}_2\text{Cu}_3(\text{CuOH})_2[\text{W}_{12}\text{O}_{40}(\text{OH})_2] \cdot 32\text{H}_2\text{O}$  sample.
- Figure S3.** ATR-FTIR spectra: (a)  $\text{Na}_2\text{Cu}_3(\text{CuOH})_2[\text{W}_{12}\text{O}_{40}(\text{OH})_2] \cdot 32\text{H}_2\text{O}$ , (b) PLA-POM film, (c) blank PLA film, (d) Extr. PLA-POM film, (e) blank Extr. PLA film
- Figure S4.** The superimposition of the ATR-FTIR spectra: (1) blank PLA film, (2) blank Extr. PLA film, (3) PLA-POM film, (4) Extr. PLA-POM film.
- Figure S5.** The DSC thermogram: (1) PLA-POM film, (2) blank PLA film, (3) Extr. PLA-POM film, (4) blank Extr. PLA film.
- Figure S6.** The results of minimum bactericidal concentration (MBC) determination for  $\text{Na}_2\text{Cu}_3(\text{CuOH})_2[\text{W}_{12}\text{O}_{40}(\text{OH})_2] \cdot 32\text{H}_2\text{O}$ .
- Figure S7.** *E. coli* CFU after inoculation of the films in the wash by several dilutions: (a) Extr. PLA-POM film, (b) blank Extr. PLA film.
- Figure S8.** *E. coli* CFU after inoculation of the PLA-POM film and blank PLA film in the wash by several dilutions.

**Figure S1.** SEM images of  $\text{Na}_2\text{Cu}_3(\text{CuOH})_2[\text{W}_{12}\text{O}_{40}(\text{OH})_2] \cdot 32\text{H}_2\text{O}$  powder in the characteristic X-ray emission.

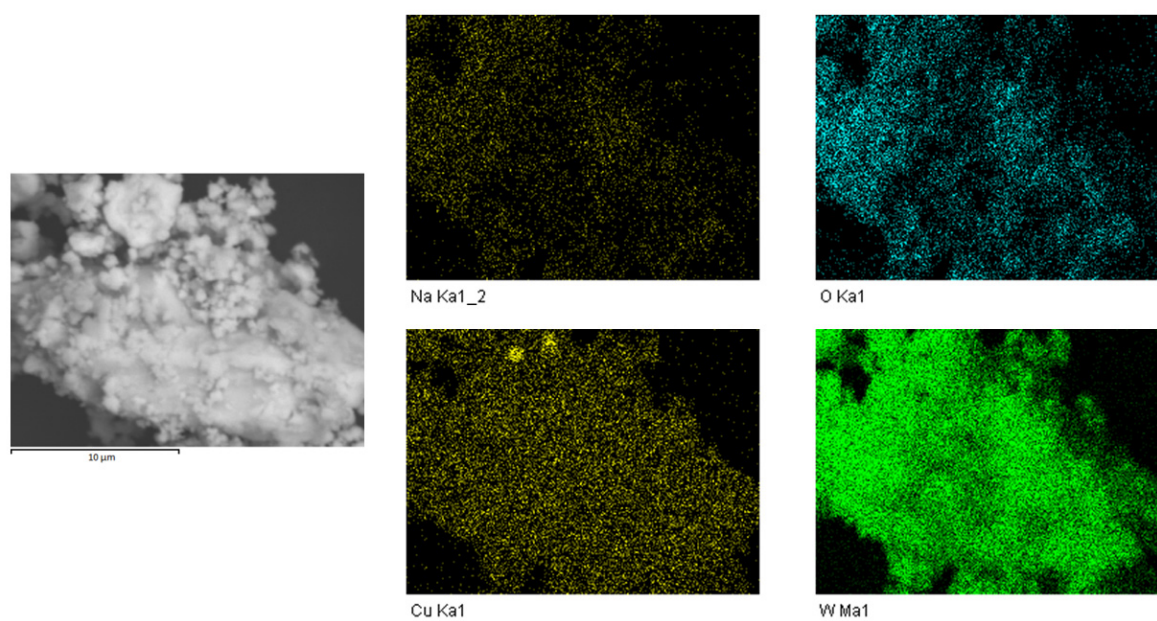

**Figure S2.** Surface micromorphology of triturated  $\text{Na}_2\text{Cu}_3(\text{CuOH})_2[\text{W}_{12}\text{O}_{40}(\text{OH})_2] \cdot 32\text{H}_2\text{O}$  sample. EDX analysis was made in points indicated (see table below).

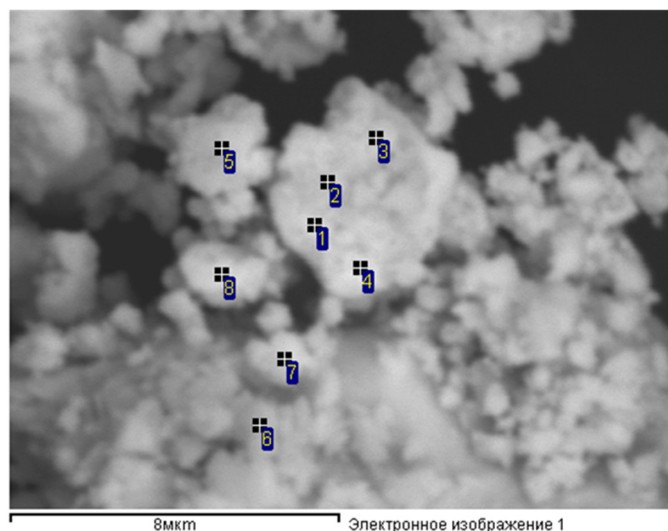

Atomic ratio of Na, Cu, and W in different points marked on Figure SI2 of triturated  $\text{Na}_2\text{Cu}_3(\text{CuOH})_2[\text{W}_{12}\text{O}_{40}(\text{OH})_2] \cdot 32\text{H}_2\text{O}$  sample:

| at. % | Points |       |       |       |       |       |       |       | Average | Atomic ratio |
|-------|--------|-------|-------|-------|-------|-------|-------|-------|---------|--------------|
|       | 1      | 2     | 3     | 4     | 5     | 6     | 7     | 8     |         |              |
| Na    | 1.25   | 1.19  | 1.16  | 1.21  | 1.20  | 1.15  | 1.13  | 1.18  | 1.18    | 1.99         |
| Cu    | 8.33   | 8.24  | 8.20  | 8.31  | 8.30  | 8.27  | 8.32  | 8.24  | 8.28    | 5.02         |
| W     | 57.11  | 57.09 | 57.20 | 57.19 | 57.15 | 57.25 | 57.28 | 57.20 | 57.18   | 11.99        |

**Figure S3.** ATR-FTIR spectra: (a)  $\text{Na}_2\text{Cu}_3(\text{CuOH})_2[\text{W}_{12}\text{O}_{40}(\text{OH})_2] \cdot 32\text{H}_2\text{O}$ , (b) PLA-POM film, (c) blank PLA film, (d) Extr. PLA-POM film, (e) blank Extr. PLA film

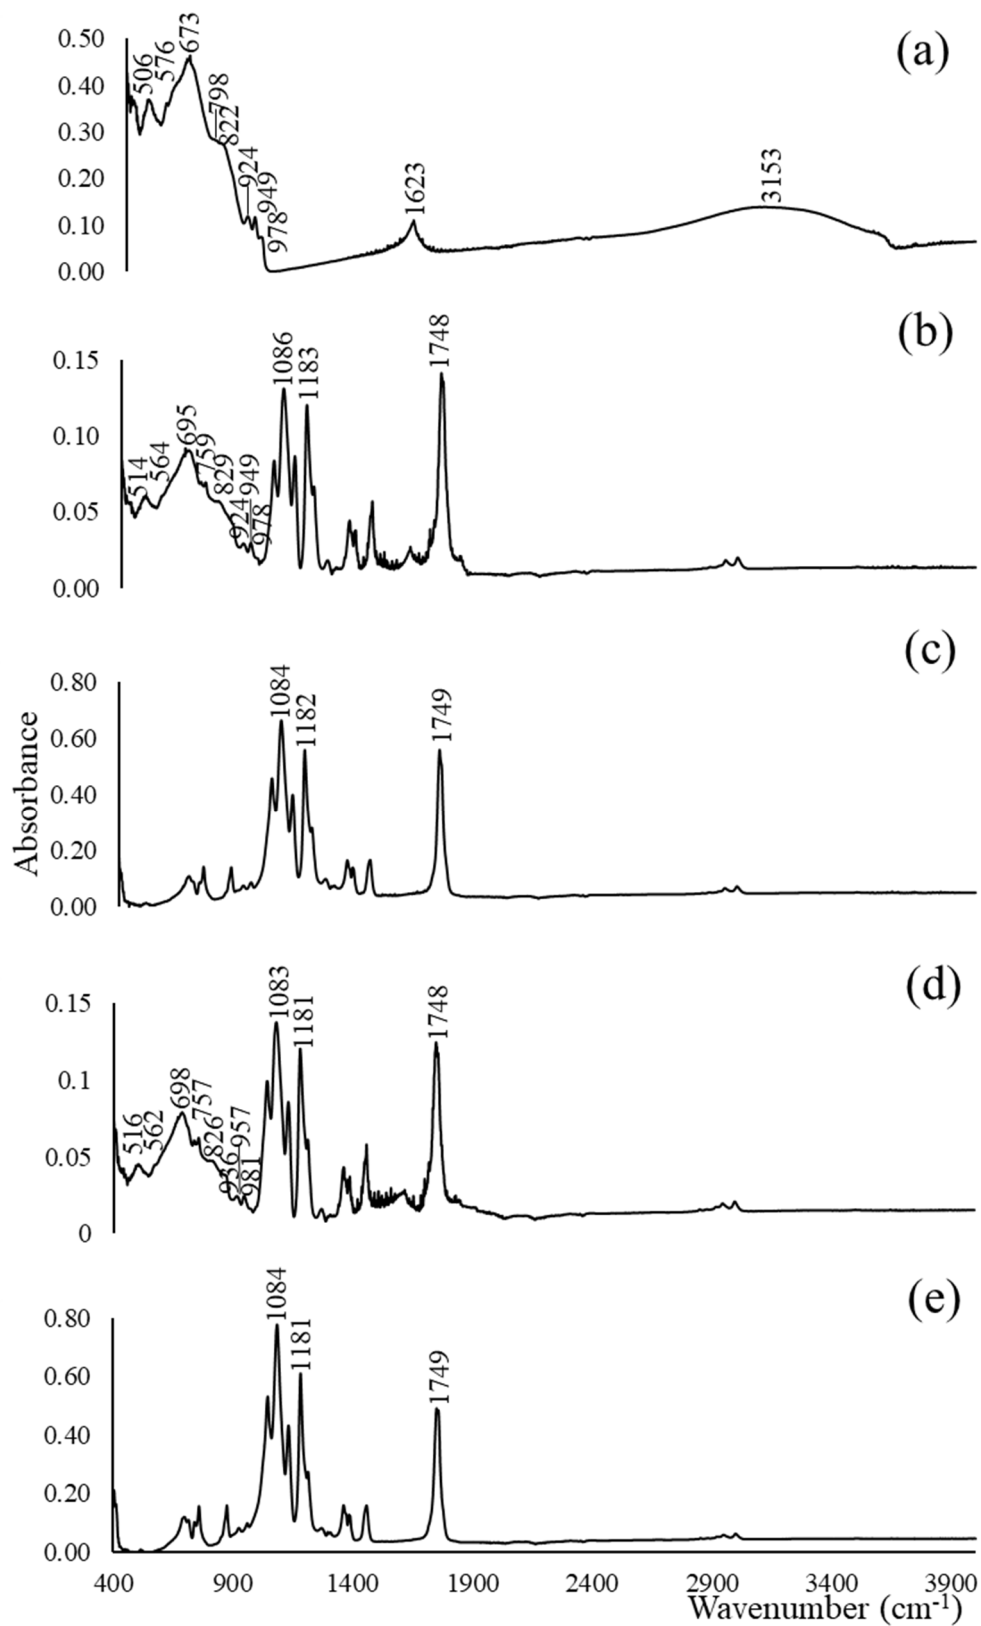

**Figure S4.** The superimposition of the ATR-FTIR spectra: (1) blank PLA film, (2) blank Extr. PLA film, (3) PLA-POM film, (4) Extr. PLA-POM film.

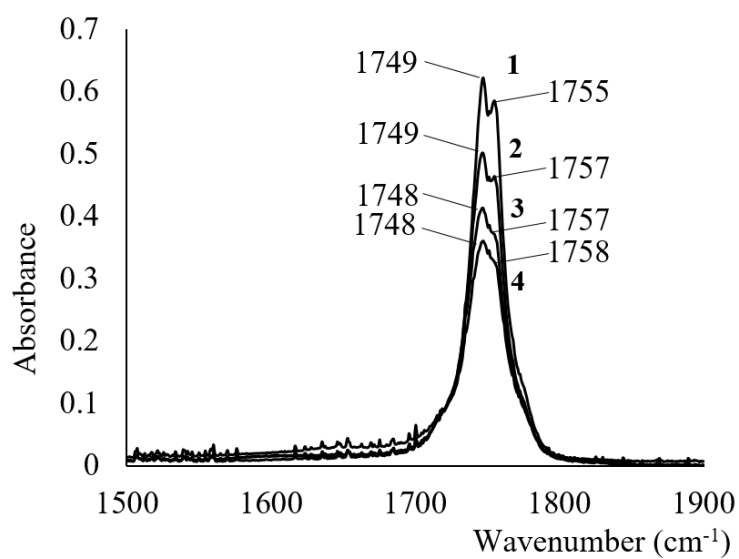

**Figure S5.** The DSC thermogram: (1) PLA-POM film, (2) blank PLA film, (3) Extr. PLA-POM film, (4) blank Extr. PLA film.

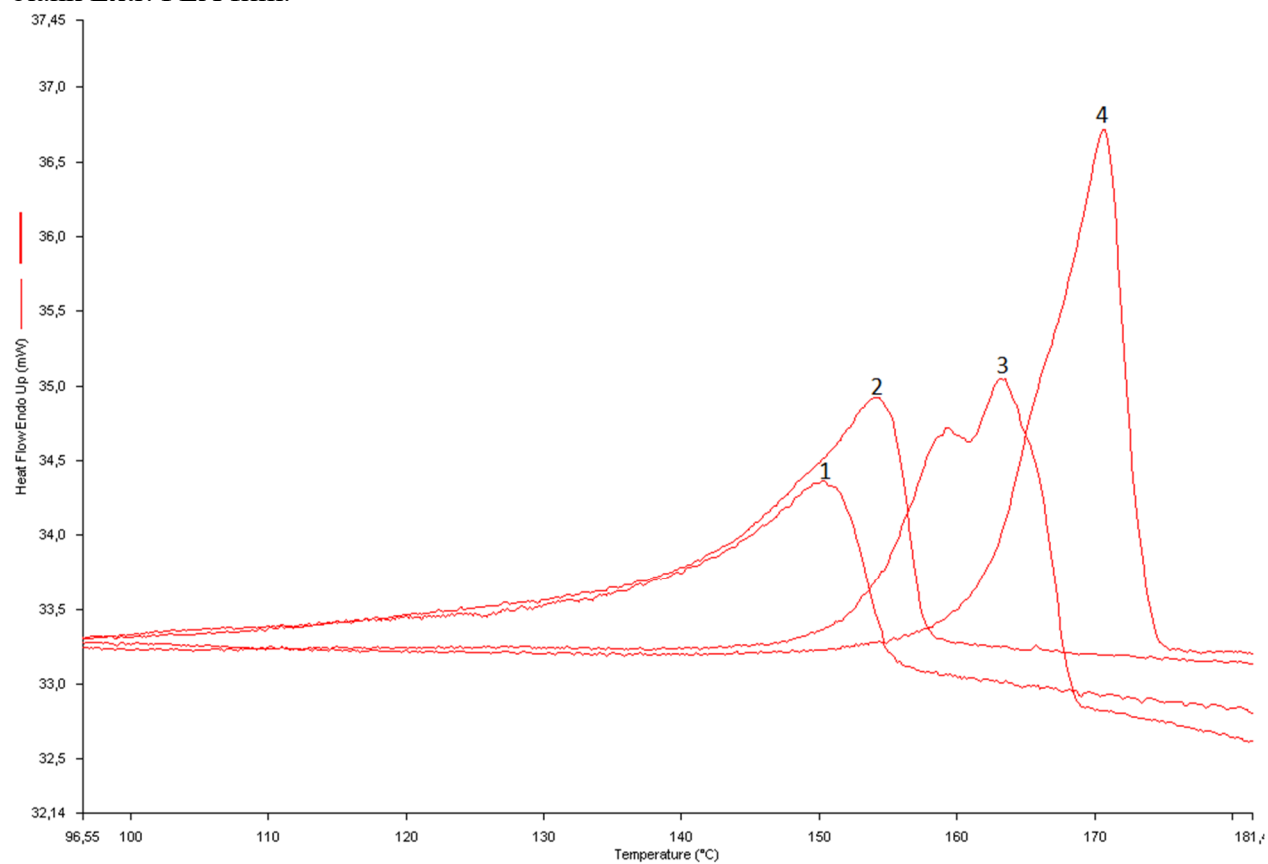

**Figure S6.** The results of minimum bactericidal concentration (MBC) determination for  $\text{Na}_2\text{Cu}_3(\text{CuOH})_2[\text{W}_{12}\text{O}_{40}(\text{OH})_2] \cdot 32\text{H}_2\text{O}$  ( $\mu\text{g/mL}$ ).

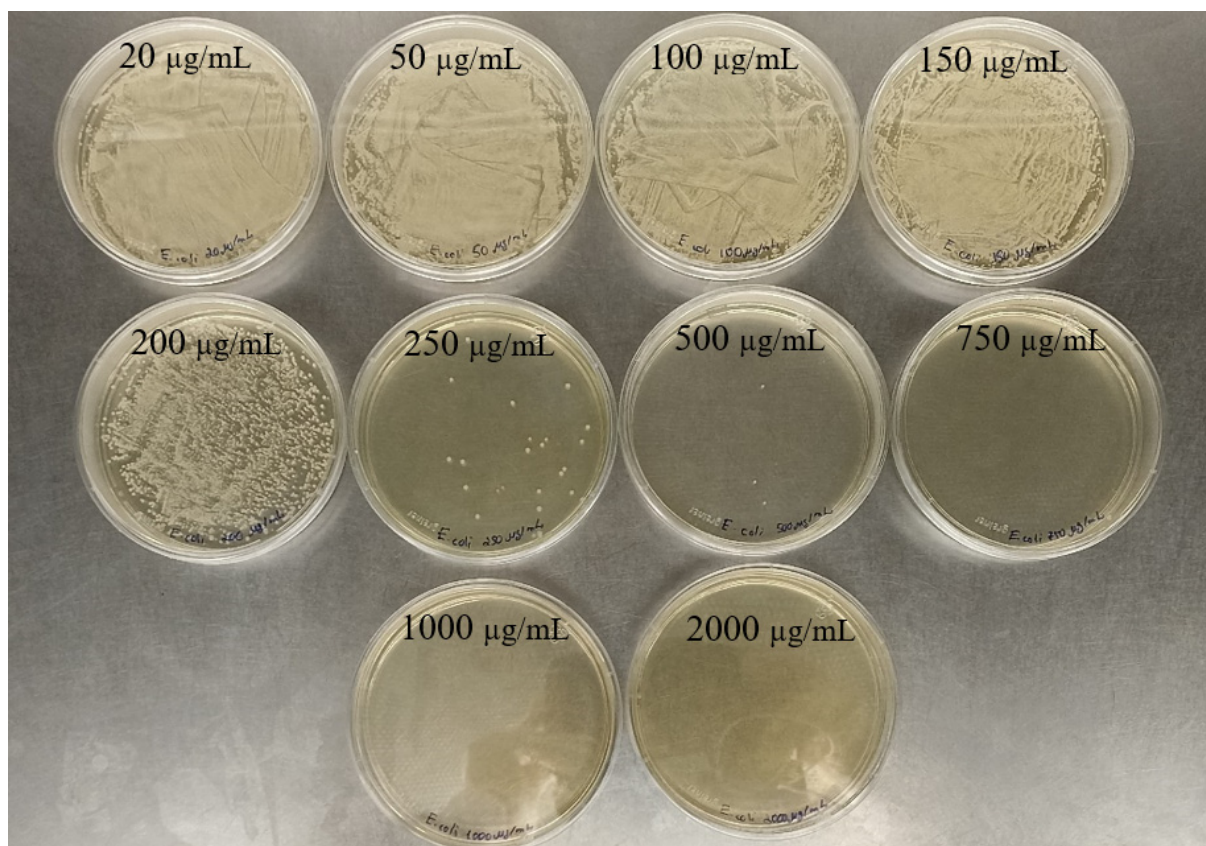

**Figure S7.** *E. coli* CFU after inoculation of the films in the wash by several dilutions (D – dilution factor): (a) Extr. PLA-POM film, (b) blank Extr. PLA film.

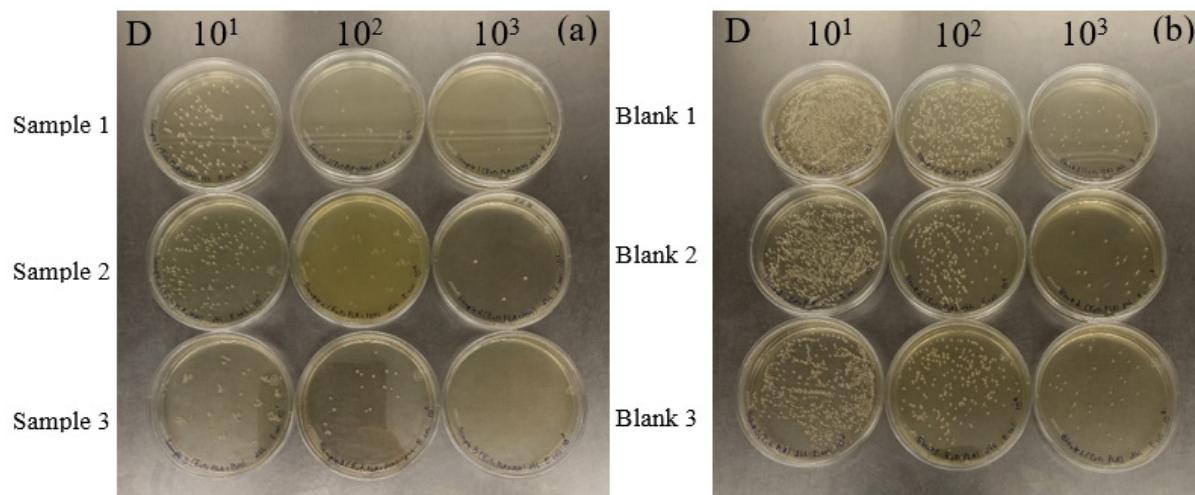



**Figure S8.** *E. coli* CFU after inoculation of the films in the wash by several dilutions (D – dilution factor): (a) PLA-POM film, (b) blank PLA film.

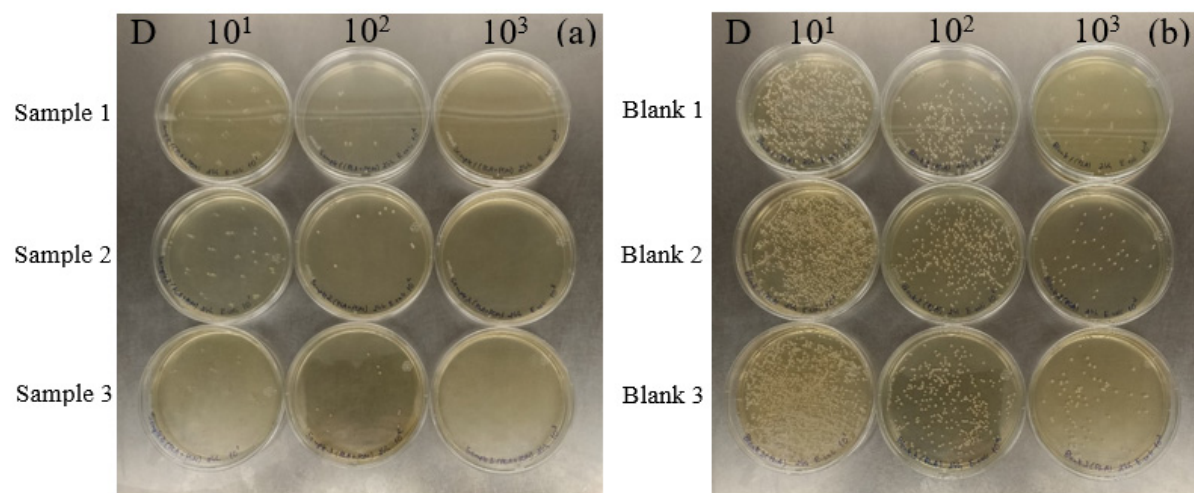

Supplement: s1 [file s1]
